# Supplementary material for: An inflammatory gene signature distinguishes neurofibroma Schwann cells and macrophages from cells in the normal peripheral nervous system
Source: PubMed Central journal article supplement (PMC5335359; doi:10.1038/srep43315), 2017-03-03
Supplement: srep43315-s1.pdf [file srep43315-s1.pdf]

## Supplementary Figures and Tables

An inflammatory gene signature distinguishes neurofibroma Schwann cells and macrophages from cells in the normal peripheral nervous system

Kwangmin Choi<sup>1</sup>, Kakajan Komurov<sup>1</sup>, Jonathan S. Fletcher<sup>1</sup>, Edwin Jousma<sup>1</sup>, Jose A. Cancelas<sup>1,2</sup>, Jianqiang Wu<sup>1\*</sup>, and Nancy Ratner<sup>1\*</sup>

<sup>1</sup>Division of Experimental Hematology and Cancer Biology, Cancer and Blood Diseases Institute, Cincinnati Children's Hospital Medical Center, Dept. of Pediatrics, University of Cincinnati, Cincinnati, OH 45229, USA

<sup>2</sup>Hoxworth Blood Center, College of Medicine, University of Cincinnati, Cincinnati, OH 45229, USA

\***Correspondence to:** Nancy.Ratner@cchmc.org or Jianqiang.Wu@cchmc.org

Phone: 513-636-9469 (Nancy Ratner), 513-636-0955 (Jianqiang Wu)

Fax: 513-636-3549

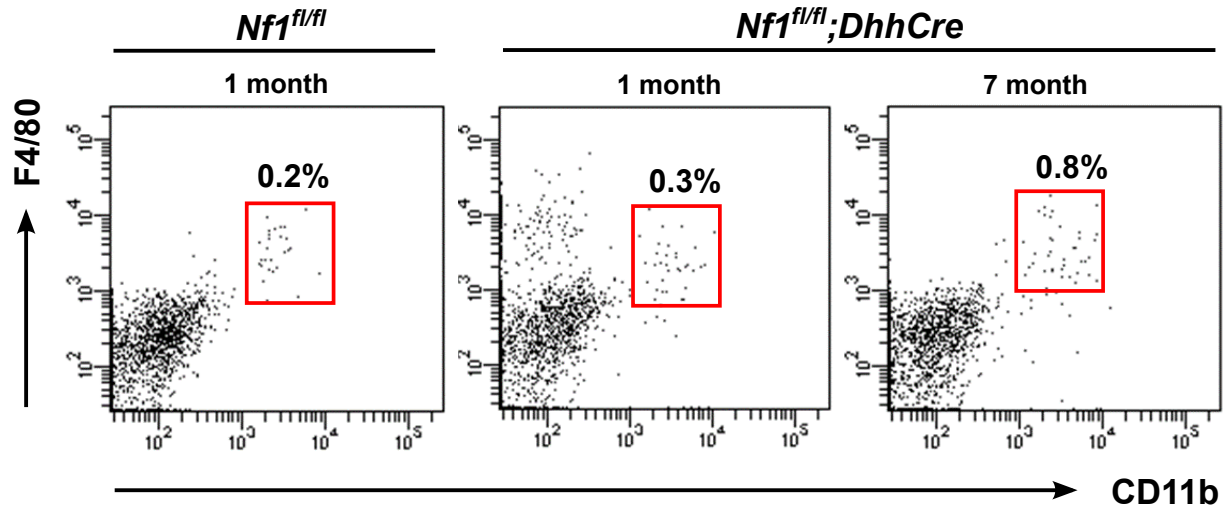

**Supplementary Figure S1: Macrophage content is increased in 7-month-old mouse neurofibromas.** Representative example of flow-cytometry analysis shows populations of F4/80<sup>+</sup>;CD11b<sup>+</sup> macrophages (red square) isolated from 1-month-old *Nf1<sup>fl/fl</sup>* (left), 1-month-old *Nf1<sup>fl/fl</sup>;DhhCre* (middle), and 7-month-old *Nf1<sup>fl/fl</sup>;DhhCre* mouse DRG/nerve, with neurofibroma if present, after *in vitro* dissociation. Some mice also contained F4/80<sup>-</sup>;CD11b<sup>+</sup> macrophages, but this varied from mouse to mouse.

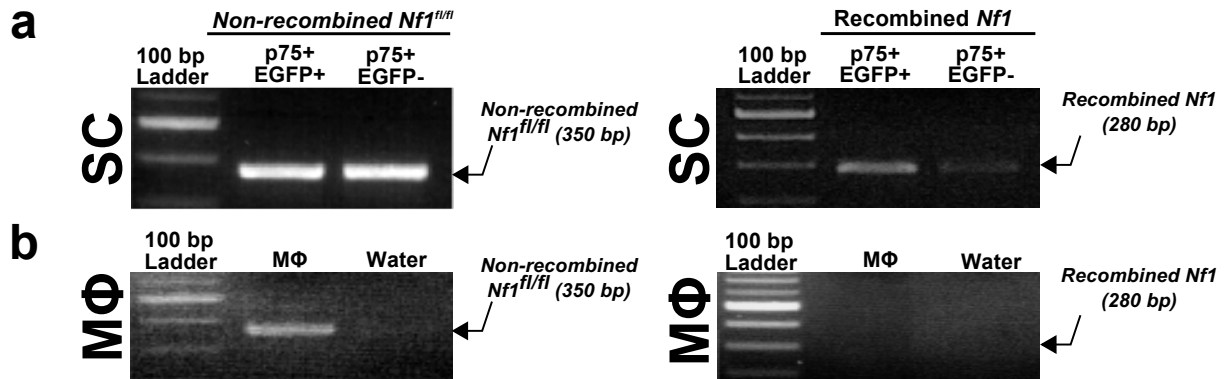

**Supplementary Figure S2: *Nf1* Cre-mediated recombination occurs in Schwann cells, not macrophages.** FACS sorted p75<sup>+</sup>EGFP<sup>+</sup> and p75<sup>+</sup>EGFP<sup>-</sup> SC populations are *Nf1<sup>fl/fl</sup>*. p75<sup>+</sup>EGFP<sup>+</sup> SCs show *Nf1* recombination; p75<sup>+</sup>EGFP<sup>-</sup> SCs showed less recombination. Macrophages do not show *Nf1* recombination. The same amounts of DNA amplified by PCR. Genotyping was performed as described in: Zhu Y et al. *Genes Dev.* 2001;15(7):859-76.

**a Schwann cell marker expression**

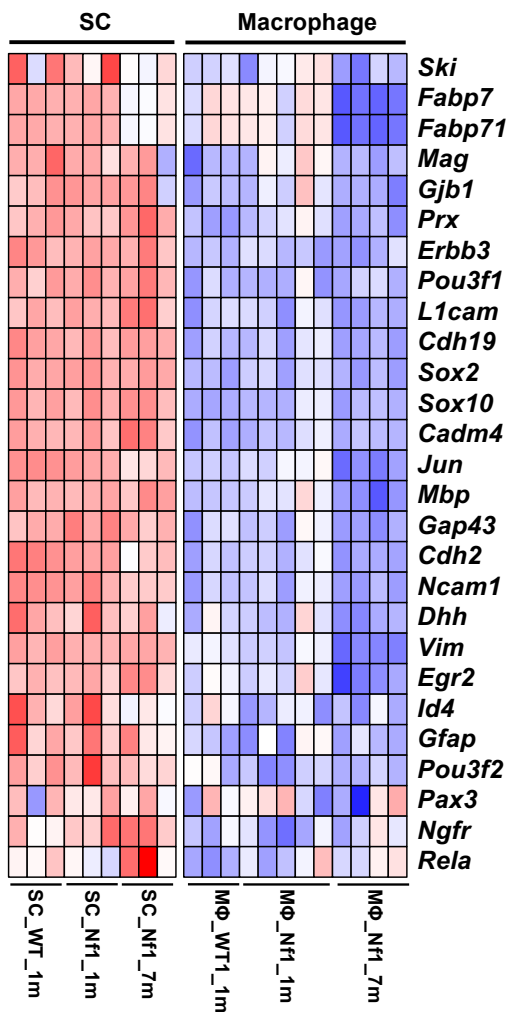

**b Macrophage marker expression**

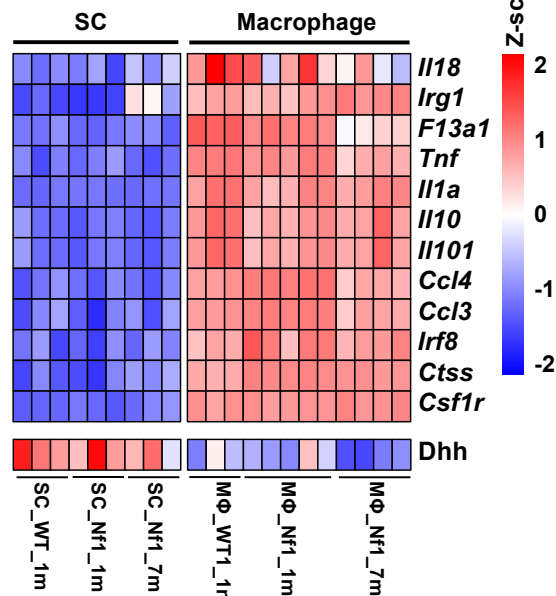

**Supplementary Figure S3: Sorted Schwann cells (a) and macrophages (b) express characteristic RNAs.** Schwann cell markers (a) were collected from Mirsky R, *et al.*, J Peripher Nerv Syst. 2008; 13(2):122-35), and include the SC marker *Dhh*.

Macrophage markers (b) were collected from R&D systems' public resource (<https://www.rndsystems.com/research-area/macrophage-markers>). Colors in these heatmaps represent Z-score:  $z = (X - \mu) / \sigma$ , where  $z$  is the z-score,  $X$  is the value of the element,  $\mu$  is the population mean, and  $\sigma$  is the standard deviation.

SC: Schwann cells | MP: macrophages  
 -2.49 Fold change: positive and negative numbers represent up- and down-regulated folds  
 6.72 Also up-regulated in human plexiform neurofibroma SCs compared to normal SCs

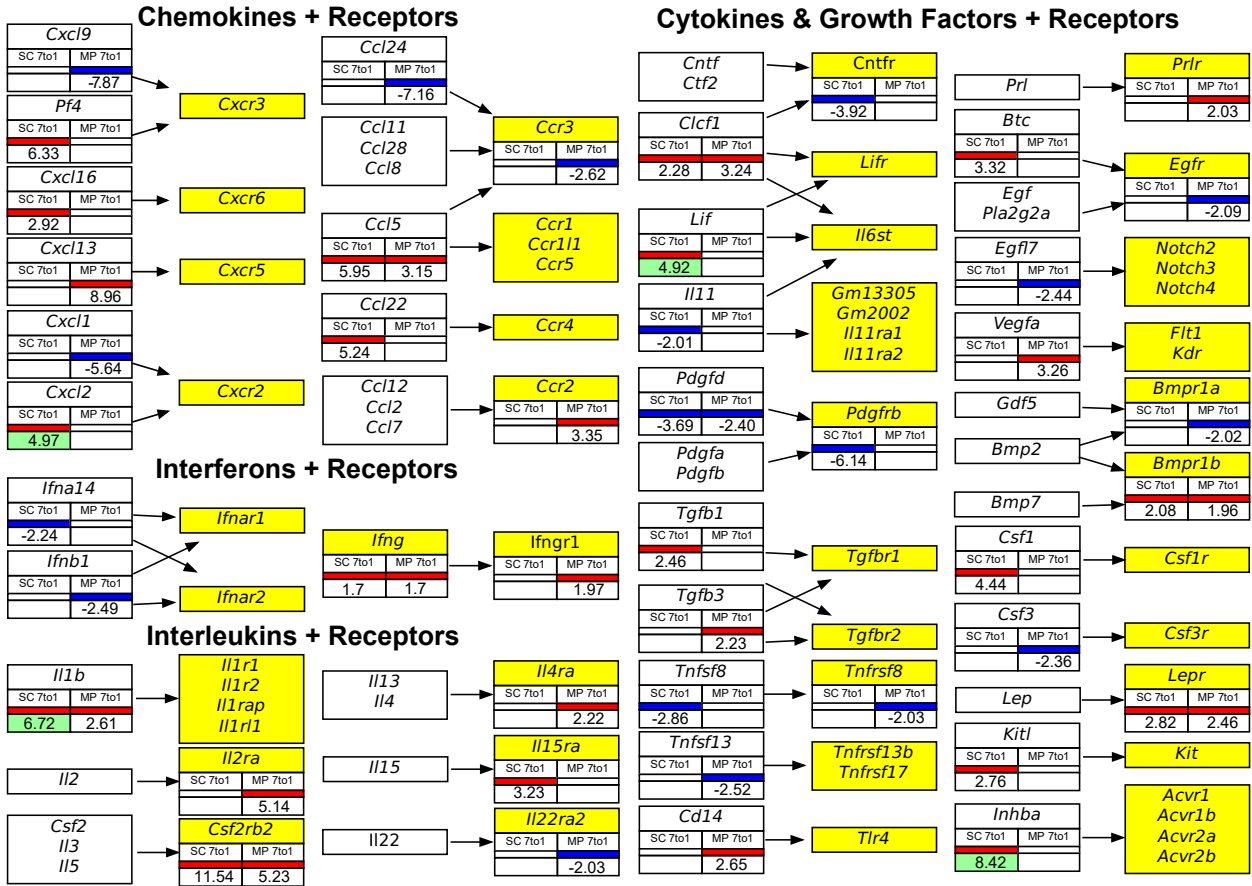

**Supplementary Figure S4: Ligand-receptor interaction interface map** Ligand (white boxes)-receptor (yellow boxes) pairs are shown if at least one gene in a given ligand-receptor pair was differentially expressed (fold change > ~2x and FDR < 0.05). Numbers in each gene box represent fold change, with up- (red) or down-regulated (blue) fold changes shown in base 10.

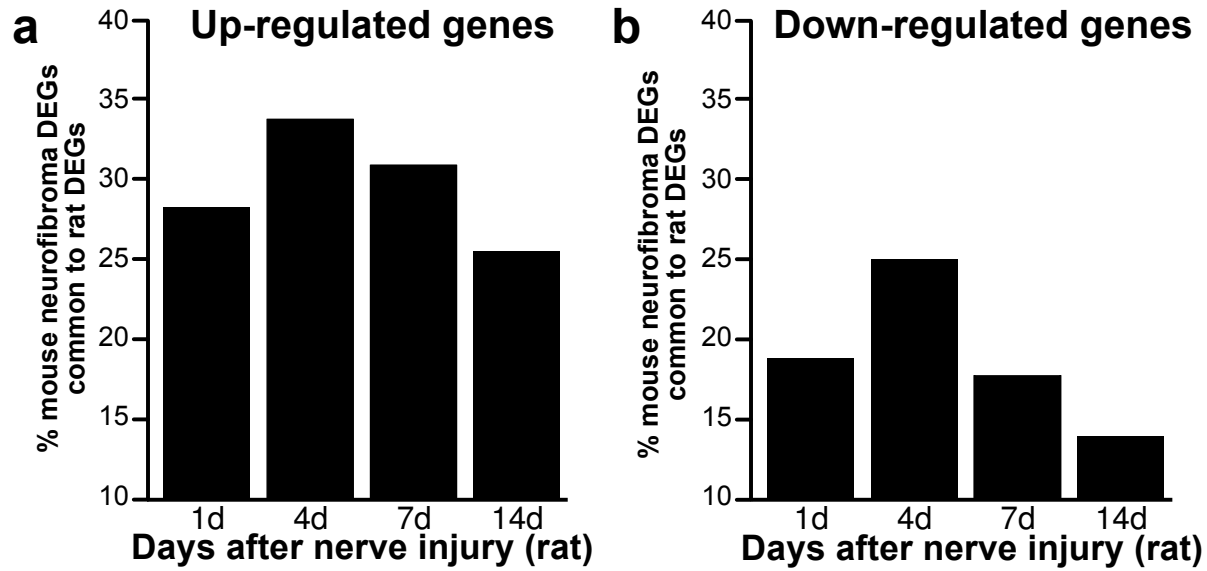

**Supplementary Figure S5: The percentage of mouse neurofibroma DEGs common to DEGs from crushed rat sciatic nerve (compared to uninjured nerve). Up-regulated rat DEGs at Day 1, 4, 7, and 14 after rat nerve injury overlapped with 28, 33, 31, and 26% of the 170 up-regulated mouse neurofibroma DEGs, respectively. Down-regulated rat DEGs at Day 1, 4, 7, and 14 after rat nerve injury were overlapped with 19, 25, 18, and 14% of the 368 down-regulated mouse neurofibroma DEGs, respectively.**

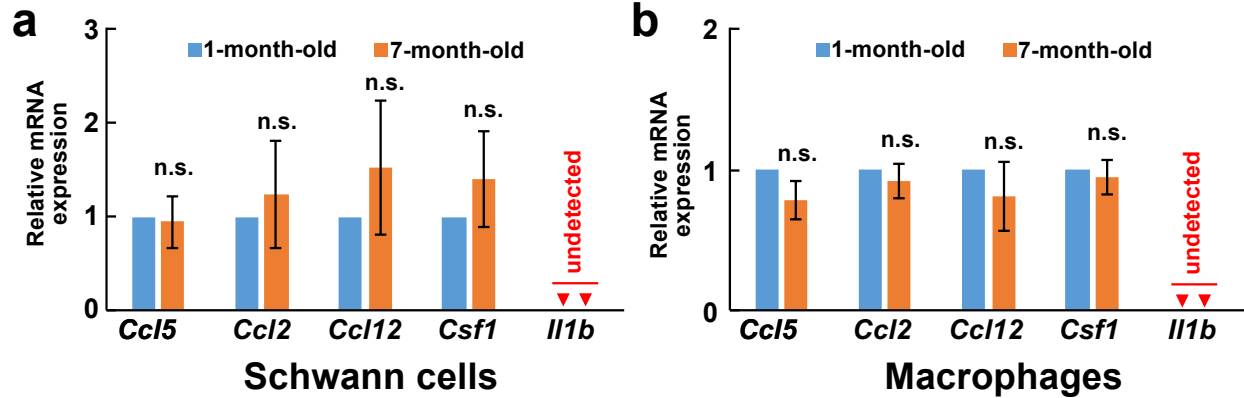

**Supplementary Figure S6: Expression of Inflammatory Cytokine mRNAs do not change in wild-type nerve/DRG between 1 and 7 months of age.** We used FACS sorted wild-type mouse Schwann cells (**a**) and wild-type mouse macrophages (**b**) to generate mRNA. We used qRT-PCR to evaluate the relative expression levels of *Ccl5*, *Ccl2*, *Ccl12*, *Csf1* and *Il1b* in 1-month-old (blue, n=3 groups, 5 mice/group) and 7-month-old (orange, n=3 experiments, 5 mice/group) wild-type mice. The relative mRNA expression was normalized to the average of 1-month-old mice. Data is shown as the average +/- S.E.M. of 3 experiments. *Il1b* mRNA is not detectable either in SCs or macrophages in wild-type mice (n.s. = no significant difference = Student's t-test  $p > 0.05$ )

**Supplementary Table S1: Differential gene expression patterns in mouse neurofibroma versus rat sciatic nerve during injury and recovery**

**# Up-regulated in Both (> 3 fold, FDR q < 0.05)**

| <b>Neurofibroma vs nerve</b> |           |
|------------------------------|-----------|
| <b>Mouse</b>                 | <b>FC</b> |
| Aif1                         | 4.46      |
| Ajap1                        | 3.04      |
| Apobec1                      | 3.37      |
| Btc                          | 5.86      |
| Ccl12                        | 3.81      |
| Ccnb1                        | 3.65      |
| Cd44                         | 4.15      |
| Cdkn3                        | 3.44      |
| Clec5a                       | 3.49      |
| Coro1a                       | 3.53      |
| Cxcl10                       | 4.58      |
| Cxcl14                       | 3.29      |
| Cytip                        | 3.33      |
| Ereg                         | 24.32     |
| F2rl1                        | 6.25      |
| Fgr                          | 3.82      |
| Fyb                          | 3.41      |
| Glpr1                        | 3.11      |
| Gp1bb                        | 3.09      |
| Gpnmb                        | 3.97      |
| Gpr35                        | 6.99      |
| Gpr65                        | 3.31      |
| Havcr2                       | 4.14      |
| Hck                          | 4.73      |
| Hcls1                        | 3.19      |
| Ifit1                        | 4.41      |

| <b>Day1 after nerve injury</b> |           |
|--------------------------------|-----------|
| <b>Rat</b>                     | <b>FC</b> |
| Aif1                           | 12.13     |
| Ajap1                          | 6.19      |
| Apobec1                        | 16.59     |
| Btc                            | 11.24     |
| Ccl12                          | 28518.46  |
| Ccnb1                          | 7.71      |
| Cd44                           | 6.99      |
| Cdkn3                          | 4.56      |
| Clec5a                         | 11.11     |
| Coro1a                         | 14.7      |
| Cxcl10                         | 8.63      |
| Cxcl14                         | 18.22     |
| Cytip                          | 11.71     |
| Ereg                           | 120.37    |
| F2rl1                          | 6.11      |
| Fgr                            | 22.27     |
| Fyb                            | 7.4       |
| Glpr1                          | 13.96     |
| Gp1bb                          | 127.21    |
| Gpnmb                          | 32.32     |
| Gpr35                          | 6.19      |
| Gpr65                          | 14.48     |
| Havcr2                         | 16.09     |
| Hck                            | 13.35     |
| Hcls1                          | 10.17     |
| Ifit1                          | 59.52     |



|         |       |
|---------|-------|
| Kcnn4   | 7.12  |
| Klk8    | 11.23 |
| Klrd1   | 4.46  |
| Ly86    | 6.14  |
| Mcm6    | 3.22  |
| Myh1    | 5.07  |
| Oasl2   | 4.28  |
| Pkib    | 6.2   |
| Pou2af1 | 3.81  |
| Ptpn22  | 3.12  |
| Pttg1   | 3.32  |
| Rps6ka6 | 3.25  |
| Sash3   | 3.21  |
| Selplg  | 3.43  |
| Siglec5 | 7.02  |
| Slamf8  | 3.51  |
| Slc14a1 | 5.65  |
| Slc15a3 | 3.6   |
| Steap1  | 3.21  |
| Tagln2  | 4.4   |
| Timp1   | 7.18  |
| Tnc     | 4.79  |
| Vav1    | 3.02  |

|         |        |
|---------|--------|
| Kcnn4   | 18.17  |
| Klk8    | 123.37 |
| Klrd1   | 6.99   |
| Ly86    | 6.92   |
| Mcm6    | 8.5    |
| Myh1    | 134.35 |
| Oasl2   | 11.97  |
| Pkib    | 4.66   |
| Pou2af1 | 3.41   |
| Ptpn22  | 3.49   |
| Pttg1   | 4      |
| Rps6ka6 | 3.49   |
| Sash3   | 8.69   |
| Selplg  | 9.23   |
| Siglec5 | 8.71   |
| Slamf8  | 10.36  |
| Slc14a1 | 12.23  |
| Slc15a3 | 6.96   |
| Steap1  | 104.18 |
| Tagln2  | 3.58   |
| Timp1   | 8.5    |
| Tnc     | 5.49   |
| Vav1    | 13.89  |

**# Down-regulated in Both (> 3 fold, FDR q < 0.05)**

| <b>Neurofibroma vs nerve</b> |           |
|------------------------------|-----------|
| <b>Mouse</b>                 | <b>FC</b> |
| Acvr1c                       | 0.13      |
| Adcy1                        | 0.14      |
| Adh1                         | 0.32      |
| Adipoq                       | 0.05      |
| Akr1c14                      | 0.28      |
| Alb                          | 0.27      |
| Aoc3                         | 0.13      |
| Aqp7                         | 0.22      |
| Aspn                         | 0.29      |
| C1qtnf9                      | 0.27      |

| <b>Day1 after nerve injury</b> |           |
|--------------------------------|-----------|
| <b>Rat</b>                     | <b>FC</b> |
| Acvr1c                         | 0.05      |
| Adcy1                          | 0.29      |
| Adh1                           | 0.02      |
| Adipoq                         | 0.14      |
| Akr1c14                        | 0.24      |
| Alb                            | 0.25      |
| Aoc3                           | 0.25      |
| Aqp7                           | 0.11      |
| Aspn                           | 0.21      |
| C1qtnf9                        | 0.19      |

|         |      |
|---------|------|
| Car3    | 0.05 |
| Ccdc80  | 0.31 |
| Cdo1    | 0.17 |
| Cidec   | 0.07 |
| Cldn19  | 0.26 |
| Cldn22  | 0.17 |
| Col23a1 | 0.22 |
| Crybb1  | 0.25 |
| Cyb5r2  | 0.25 |
| Cyp2e1  | 0.05 |
| Ddn     | 0.26 |
| Dmrt2   | 0.23 |
| Dpep1   | 0.25 |
| Dpt     | 0.09 |
| Drp2    | 0.26 |
| Efnb3   | 0.23 |
| Egfl6   | 0.27 |
| Eln     | 0.33 |
| Emid1   | 0.28 |
| Extl1   | 0.21 |
| Fa2h    | 0.19 |
| Fgf4    | 0.09 |
| Fmod    | 0.16 |
| Gdf10   | 0.17 |
| Gsta3   | 0.2  |
| Kcnk1   | 0.26 |
| Lect1   | 0.29 |
| Lep     | 0.04 |
| Lgals12 | 0.27 |
| Limch1  | 0.3  |
| Mag     | 0.26 |
| Mal     | 0.3  |
| Mc2r    | 0.2  |
| Mettl7b | 0.28 |
| Mrap    | 0.29 |
| Myrip   | 0.3  |
| Nnat    | 0.27 |
| Ogn     | 0.29 |
| Pck1    | 0.15 |

|         |      |
|---------|------|
| Car3    | 0.17 |
| Ccdc80  | 0.23 |
| Cdo1    | 0.1  |
| Cidec   | 0.05 |
| Cldn19  | 0.27 |
| Cldn22  | 0.18 |
| Col23a1 | 0.18 |
| Crybb1  | 0.16 |
| Cyb5r2  | 0.2  |
| Cyp2e1  | 0.14 |
| Ddn     | 0.1  |
| Dmrt2   | 0.24 |
| Dpep1   | 0.08 |
| Dpt     | 0.31 |
| Drp2    | 0.32 |
| Efnb3   | 0.11 |
| Egfl6   | 0.07 |
| Eln     | 0.11 |
| Emid1   | 0.25 |
| Extl1   | 0.31 |
| Fa2h    | 0.15 |
| Fgf4    | 0.15 |
| Fmod    | 0.1  |
| Gdf10   | 0.27 |
| Gsta3   | 0.13 |
| Kcnk1   | 0.23 |
| Lect1   | 0.28 |
| Lep     | 0.04 |
| Lgals12 | 0.04 |
| Limch1  | 0.32 |
| Mag     | 0.27 |
| Mal     | 0.23 |
| Mc2r    | 0.09 |
| Mettl7b | 0.1  |
| Mrap    | 0.23 |
| Myrip   | 0.17 |
| Nnat    | 0.25 |
| Ogn     | 0.18 |
| Pck1    | 0.03 |

|         |      |
|---------|------|
| Pla2g5  | 0.08 |
| Plip    | 0.24 |
| Prx     | 0.23 |
| Ptger3  | 0.26 |
| Rbp7    | 0.27 |
| Reep6   | 0.31 |
| Retn    | 0.08 |
| Rhobtb3 | 0.23 |
| Sema4g  | 0.17 |
| Sema5a  | 0.18 |
| Slc15a2 | 0.24 |
| Slc36a2 | 0.17 |
| Slc6a1  | 0.13 |
| Slc7a10 | 0.31 |
| Smtn    | 0.25 |
| Spon2   | 0.28 |
| St8sia5 | 0.15 |
| Sult1a1 | 0.32 |
| Thrsp   | 0.3  |
| Timp4   | 0.16 |
| Tmem40  | 0.21 |

|         |      |
|---------|------|
| Pla2g5  | 0.11 |
| Plip    | 0.25 |
| Prx     | 0.28 |
| Ptger3  | 0.32 |
| Rbp7    | 0.14 |
| Reep6   | 0.18 |
| Retn    | 0.15 |
| Rhobtb3 | 0.24 |
| Sema4g  | 0.18 |
| Sema5a  | 0.21 |
| Slc15a2 | 0.13 |
| Slc36a2 | 0.21 |
| Slc6a1  | 0.1  |
| Slc7a10 | 0.06 |
| Smtn    | 0.22 |
| Spon2   | 0.3  |
| St8sia5 | 0.15 |
| Sult1a1 | 0.07 |
| Thrsp   | 0.03 |
| Timp4   | 0.17 |
| Tmem40  | 0    |

**# Up-regulated in Both (> 3 Fold, FDR q < 0.05)**

| <b>Neurofibroma vs nerve</b> |           |
|------------------------------|-----------|
| <b>Mouse</b>                 | <b>FC</b> |
| Aif1                         | 4.46      |
| Ajap1                        | 3.04      |
| Apobec1                      | 3.37      |
| Bdnf                         | 5.73      |
| Btc                          | 5.86      |
| Ccl12                        | 3.81      |
| Ccl5                         | 4.56      |
| Ccnb1                        | 3.65      |
| Ccnd1                        | 3.86      |
| Cd3e                         | 3.56      |
| Cd44                         | 4.15      |
| Cdkn2a                       | 10.21     |

| <b>Day4 after nerve injury</b> |           |
|--------------------------------|-----------|
| <b>Rat</b>                     | <b>FC</b> |
| Aif1                           | 10.05     |
| Ajap1                          | 13.62     |
| Apobec1                        | 20.25     |
| Bdnf                           | 3.38      |
| Btc                            | 20.45     |
| Ccl12                          | 5438.79   |
| Ccl5                           | 4.21      |
| Ccnb1                          | 12.41     |
| Ccnd1                          | 3.74      |
| Cd3e                           | 14.62     |
| Cd44                           | 5.85      |
| Cdkn2a                         | 3.96      |

|         |      |
|---------|------|
| Cdkn3   | 3.44 |
| Clec5a  | 3.49 |
| Coro1a  | 3.53 |
| Crmp1   | 6.51 |
| Cxcl10  | 4.58 |
| Cxcl14  | 3.29 |
| Cytip   | 3.33 |
| F2r     | 3.59 |
| F2r1    | 6.25 |
| Fgr     | 3.82 |
| Fyb     | 3.41 |
| Glipr1  | 3.11 |
| Gp1bb   | 3.09 |
| Gpnmb   | 3.97 |
| Gpr35   | 6.99 |
| Gpr65   | 3.31 |
| Havcr2  | 4.14 |
| Hck     | 4.73 |
| Hcls1   | 3.19 |
| Hs6st2  | 4.29 |
| Itga10  | 3.01 |
| Kcnn4   | 7.12 |
| Klrd1   | 4.46 |
| Ltbp2   | 3.15 |
| Ly86    | 6.14 |
| Mcm6    | 3.22 |
| Ms4a4c  | 5.59 |
| Myh1    | 5.07 |
| Neto2   | 3.29 |
| Oasl2   | 4.28 |
| Pkib    | 6.2  |
| Ptpn22  | 3.12 |
| Pttg1   | 3.32 |
| Sash3   | 3.21 |
| Selplg  | 3.43 |
| Siglec5 | 7.02 |
| Slamf8  | 3.51 |
| Slc14a1 | 5.65 |
| Slc15a3 | 3.6  |

|         |       |
|---------|-------|
| Cdkn3   | 6.3   |
| Clec5a  | 6.6   |
| Coro1a  | 8.56  |
| Crmp1   | 3.81  |
| Cxcl10  | 8.4   |
| Cxcl14  | 4.56  |
| Cytip   | 11.21 |
| F2r     | 3.09  |
| F2r1    | 3.86  |
| Fgr     | 9.6   |
| Fyb     | 4.47  |
| Glipr1  | 6.94  |
| Gp1bb   | 95.72 |
| Gpnmb   | 104.3 |
| Gpr35   | 5.13  |
| Gpr65   | 12.36 |
| Havcr2  | 12.52 |
| Hck     | 12.9  |
| Hcls1   | 8.01  |
| Hs6st2  | 3.01  |
| Itga10  | 4.34  |
| Kcnn4   | 23.78 |
| Klrd1   | 16.04 |
| Ltbp2   | 5.17  |
| Ly86    | 5.72  |
| Mcm6    | 7.63  |
| Ms4a4c  | 12.92 |
| Myh1    | 8.57  |
| Neto2   | 4.01  |
| Oasl2   | 5.54  |
| Pkib    | 4.12  |
| Ptpn22  | 5.43  |
| Pttg1   | 5.4   |
| Sash3   | 7.39  |
| Selplg  | 4.93  |
| Siglec5 | 4.36  |
| Slamf8  | 6.86  |
| Slc14a1 | 9.46  |
| Slc15a3 | 8.07  |

|        |      |
|--------|------|
| Sox11  | 7.99 |
| Steap1 | 3.21 |
| Timp1  | 7.18 |
| Tnc    | 4.79 |
| Vav1   | 3.02 |

|        |       |
|--------|-------|
| Sox11  | 3.86  |
| Steap1 | 47.27 |
| Timp1  | 3.17  |
| Tnc    | 16.94 |
| Vav1   | 17.58 |

**# Down-regulated in Both (> 3 fold, FDR q < 0.05)**

| <b>Neurofibroma vs nerve</b> |           |
|------------------------------|-----------|
| <b>Mouse</b>                 | <b>FC</b> |
| Acvr1c                       | 0.13      |
| Adcy1                        | 0.14      |
| Adh1                         | 0.32      |
| Adipoq                       | 0.05      |
| Alb                          | 0.27      |
| Aoc3                         | 0.13      |
| Aqp7                         | 0.22      |
| C1qtnf9                      | 0.27      |
| Car3                         | 0.05      |
| Car4                         | 0.14      |
| Casq2                        | 0.31      |
| Cdo1                         | 0.17      |
| Cidec                        | 0.07      |
| Clcn2                        | 0.25      |
| Cldn19                       | 0.26      |
| Cldn22                       | 0.17      |
| Cntf                         | 0.3       |
| Col23a1                      | 0.22      |
| Cryaa                        | 0.23      |
| Crybb1                       | 0.25      |
| Ctnnal1                      | 0.23      |
| Cttnbp2                      | 0.29      |
| Cyb5r2                       | 0.25      |
| Cyp2e1                       | 0.05      |
| Ddah1                        | 0.22      |
| Ddn                          | 0.26      |
| Dmrt2                        | 0.23      |
| Dpep1                        | 0.25      |

| <b>Day4 after nerve injury</b> |           |
|--------------------------------|-----------|
| <b>Rat</b>                     | <b>FC</b> |
| Acvr1c                         | 0.04      |
| Adcy1                          | 0.32      |
| Adh1                           | 0.01      |
| Adipoq                         | 0.05      |
| Alb                            | 0.08      |
| Aoc3                           | 0.32      |
| Aqp7                           | 0.07      |
| C1qtnf9                        | 0.32      |
| Car3                           | 0.06      |
| Car4                           | 0.16      |
| Casq2                          | 0.25      |
| Cdo1                           | 0.08      |
| Cidec                          | 0.02      |
| Clcn2                          | 0.15      |
| Cldn19                         | 0.08      |
| Cldn22                         | 0.25      |
| Cntf                           | 0.15      |
| Col23a1                        | 0.05      |
| Cryaa                          | 0.04      |
| Crybb1                         | 0.06      |
| Ctnnal1                        | 0.29      |
| Cttnbp2                        | 0.21      |
| Cyb5r2                         | 0.07      |
| Cyp2e1                         | 0.12      |
| Ddah1                          | 0.09      |
| Ddn                            | 0.04      |
| Dmrt2                          | 0.09      |
| Dpep1                          | 0.13      |

|         |      |
|---------|------|
| Drp2    | 0.26 |
| Efnb3   | 0.23 |
| Egfl6   | 0.27 |
| Eln     | 0.33 |
| Emid1   | 0.28 |
| Extl1   | 0.21 |
| Fa2h    | 0.19 |
| Fgf4    | 0.09 |
| Fgf7    | 0.24 |
| Filip1  | 0.17 |
| Fmod    | 0.16 |
| Gdf10   | 0.17 |
| Ghr     | 0.25 |
| Gjb1    | 0.15 |
| Gpm6a   | 0.31 |
| Jakmip2 | 0.33 |
| Kcnk1   | 0.26 |
| Kif13b  | 0.24 |
| Krt19   | 0.2  |
| Lect1   | 0.29 |
| Lep     | 0.04 |
| Lgals12 | 0.27 |
| Limch1  | 0.3  |
| Lipe    | 0.28 |
| Lpl     | 0.15 |
| Mag     | 0.26 |
| Mal     | 0.3  |
| Mc2r    | 0.2  |
| Mettl7b | 0.28 |
| Mgll    | 0.23 |
| Mme     | 0.16 |
| Mrap    | 0.29 |
| Myrip   | 0.3  |
| Nrgn    | 0.28 |
| Ogn     | 0.29 |
| Pck1    | 0.15 |
| Pla2g5  | 0.08 |
| Plip    | 0.24 |
| Prr15   | 0.23 |

|         |      |
|---------|------|
| Drp2    | 0.13 |
| Efnb3   | 0.15 |
| Egfl6   | 0.08 |
| Eln     | 0.08 |
| Emid1   | 0.09 |
| Extl1   | 0.24 |
| Fa2h    | 0.04 |
| Fgf4    | 0.02 |
| Fgf7    | 0.26 |
| Filip1  | 0.25 |
| Fmod    | 0.09 |
| Gdf10   | 0.16 |
| Ghr     | 0.25 |
| Gjb1    | 0.1  |
| Gpm6a   | 0.18 |
| Jakmip2 | 0.22 |
| Kcnk1   | 0.05 |
| Kif13b  | 0.29 |
| Krt19   | 0.19 |
| Lect1   | 0.05 |
| Lep     | 0.02 |
| Lgals12 | 0.04 |
| Limch1  | 0.11 |
| Lipe    | 0.28 |
| Lpl     | 0.24 |
| Mag     | 0.07 |
| Mal     | 0.09 |
| Mc2r    | 0.08 |
| Mettl7b | 0.08 |
| Mgll    | 0.2  |
| Mme     | 0.26 |
| Mrap    | 0.06 |
| Myrip   | 0.12 |
| Nrgn    | 0.21 |
| Ogn     | 0.31 |
| Pck1    | 0.03 |
| Pla2g5  | 0.08 |
| Plip    | 0.14 |
| Prr15   | 0.21 |

|         |      |
|---------|------|
| Prss12  | 0.26 |
| Prx     | 0.23 |
| Rapgef3 | 0.32 |
| Rbp4    | 0.07 |
| Rbp7    | 0.27 |
| Reep6   | 0.31 |
| Retn    | 0.08 |
| Rhobtb3 | 0.23 |
| Sema4g  | 0.17 |
| Sema5a  | 0.18 |
| Slc15a2 | 0.24 |
| Slc36a2 | 0.17 |
| Slc6a1  | 0.13 |
| Slc6a4  | 0.31 |
| Slc7a10 | 0.31 |
| Smtn    | 0.25 |
| St8sia5 | 0.15 |
| Sucnr1  | 0.25 |
| Sult1a1 | 0.32 |
| Tesk2   | 0.28 |
| Thrsp   | 0.3  |
| Timp4   | 0.16 |
| Tmem27  | 0.17 |
| Tmem40  | 0.21 |

|         |      |
|---------|------|
| Prss12  | 0.2  |
| Prx     | 0.08 |
| Rapgef3 | 0.29 |
| Rbp4    | 0.22 |
| Rbp7    | 0.2  |
| Reep6   | 0.07 |
| Retn    | 0.07 |
| Rhobtb3 | 0.16 |
| Sema4g  | 0.08 |
| Sema5a  | 0.07 |
| Slc15a2 | 0.12 |
| Slc36a2 | 0.07 |
| Slc6a1  | 0.19 |
| Slc6a4  | 0.15 |
| Slc7a10 | 0.18 |
| Smtn    | 0.27 |
| St8sia5 | 0.07 |
| Sucnr1  | 0.26 |
| Sult1a1 | 0.07 |
| Tesk2   | 0.33 |
| Thrsp   | 0.01 |
| Timp4   | 0.14 |
| Tmem27  | 0.01 |
| Tmem40  | 0.08 |

**# Up-regulated in Both (> 3 fold, FDR q < 0.05)**

| <b>Neurofibroma vs nerve</b> |           |
|------------------------------|-----------|
| <b>Mouse</b>                 | <b>FC</b> |
| Aif1                         | 4.46      |
| Ajap1                        | 3.04      |
| Apobec1                      | 3.37      |
| Btc                          | 5.86      |
| Ccl12                        | 3.81      |
| Ccl5                         | 4.56      |
| Ccnb1                        | 3.65      |
| Cd3e                         | 3.56      |
| Cd44                         | 4.15      |

| <b>Day7 after nerve injury</b> |           |
|--------------------------------|-----------|
| <b>Rat</b>                     | <b>FC</b> |
| Aif1                           | 5.29      |
| Ajap1                          | 11.29     |
| Apobec1                        | 8.48      |
| Btc                            | 15.06     |
| Ccl12                          | 3169.42   |
| Ccl5                           | 3.38      |
| Ccnb1                          | 4.66      |
| Cd3e                           | 6.62      |
| Cd44                           | 4.07      |

|         |       |
|---------|-------|
| Cdkn2a  | 10.21 |
| Clec5a  | 3.49  |
| Coro1a  | 3.53  |
| Cst6    | 3.46  |
| Cxcl10  | 4.58  |
| Cxcl14  | 3.29  |
| Cytip   | 3.33  |
| F2rl1   | 6.25  |
| Fgr     | 3.82  |
| Fyb     | 3.41  |
| Gabrb2  | 4.54  |
| Gfra3   | 9.8   |
| Glipr1  | 3.11  |
| Gpnmb   | 3.97  |
| Gpr35   | 6.99  |
| Gpr65   | 3.31  |
| Havcr2  | 4.14  |
| Hck     | 4.73  |
| Hcls1   | 3.19  |
| Ifit1   | 4.41  |
| Itga10  | 3.01  |
| Kcnj10  | 14.34 |
| Kcnn4   | 7.12  |
| Klrd1   | 4.46  |
| Ltbp2   | 3.15  |
| Ly86    | 6.14  |
| Mcm6    | 3.22  |
| Ms4a4c  | 5.59  |
| Myh1    | 5.07  |
| Neto2   | 3.29  |
| Oasl2   | 4.28  |
| Pkib    | 6.2   |
| Ptpn22  | 3.12  |
| Ptprz1  | 13.22 |
| Sash3   | 3.21  |
| Selplg  | 3.43  |
| Siglec5 | 7.02  |
| Slamf8  | 3.51  |
| Slc14a1 | 5.65  |

|         |       |
|---------|-------|
| Cdkn2a  | 3.52  |
| Clec5a  | 4.13  |
| Coro1a  | 4.86  |
| Cst6    | 6.43  |
| Cxcl10  | 5.38  |
| Cxcl14  | 4.28  |
| Cytip   | 7.36  |
| F2rl1   | 4.71  |
| Fgr     | 6.65  |
| Fyb     | 3.33  |
| Gabrb2  | 262.3 |
| Gfra3   | 3.66  |
| Glipr1  | 4.39  |
| Gpnmb   | 54.47 |
| Gpr35   | 4.78  |
| Gpr65   | 7.06  |
| Havcr2  | 5.34  |
| Hck     | 7.23  |
| Hcls1   | 4.08  |
| Ifit1   | 4.68  |
| Itga10  | 4.75  |
| Kcnj10  | 5.1   |
| Kcnn4   | 12.25 |
| Klrd1   | 13.12 |
| Ltbp2   | 4.88  |
| Ly86    | 4.12  |
| Mcm6    | 3.16  |
| Ms4a4c  | 7.17  |
| Myh1    | 11.35 |
| Neto2   | 5.19  |
| Oasl2   | 3.39  |
| Pkib    | 3.3   |
| Ptpn22  | 4.54  |
| Ptprz1  | 3.09  |
| Sash3   | 5.12  |
| Selplg  | 3.48  |
| Siglec5 | 4.15  |
| Slamf8  | 6.38  |
| Slc14a1 | 9.13  |



|         |      |
|---------|------|
| Slc15a3 | 3.6  |
| Steap1  | 3.21 |
| Tnc     | 4.79 |
| Vav1    | 3.02 |

|         |       |
|---------|-------|
| Slc15a3 | 5.49  |
| Steap1  | 19.23 |
| Tnc     | 7.58  |
| Vav1    | 8.51  |

**# Down-regulated in Both (> 3 fold, FDR q < 0.05)**

| <b>Neurofibroma vs nerve</b> |           |
|------------------------------|-----------|
| <b>Mouse</b>                 | <b>FC</b> |
| Acvr1c                       | 0.13      |
| Adh1                         | 0.32      |
| Adipoq                       | 0.05      |
| Alb                          | 0.27      |
| Aqp7                         | 0.22      |
| Car3                         | 0.05      |
| Car4                         | 0.14      |
| Cdo1                         | 0.17      |
| Cidec                        | 0.07      |
| Cldn22                       | 0.17      |
| Cntf                         | 0.3       |
| Col23a1                      | 0.22      |
| Cryaa                        | 0.23      |
| Crybb1                       | 0.25      |
| Cyb5r2                       | 0.25      |
| Cyp2e1                       | 0.05      |
| Ddah1                        | 0.22      |
| Ddn                          | 0.26      |
| Dpep1                        | 0.25      |
| Drp2                         | 0.26      |
| Eln                          | 0.33      |
| Fa2h                         | 0.19      |
| Fgf4                         | 0.09      |
| Fgf7                         | 0.24      |
| Filip1                       | 0.17      |
| Fmod                         | 0.16      |
| Gdf10                        | 0.17      |
| Gjb1                         | 0.15      |
| Gpm6a                        | 0.31      |

| <b>Day7 after nerve injury</b> |           |
|--------------------------------|-----------|
| <b>Rat</b>                     | <b>FC</b> |
| Acvr1c                         | 0.14      |
| Adh1                           | 0.03      |
| Adipoq                         | 0.16      |
| Alb                            | 0.16      |
| Aqp7                           | 0.23      |
| Car3                           | 0.17      |
| Car4                           | 0.2       |
| Cdo1                           | 0.2       |
| Cidec                          | 0.07      |
| Cldn22                         | 0.29      |
| Cntf                           | 0.18      |
| Col23a1                        | 0.09      |
| Cryaa                          | 0.19      |
| Crybb1                         | 0.1       |
| Cyb5r2                         | 0.17      |
| Cyp2e1                         | 0.22      |
| Ddah1                          | 0.17      |
| Ddn                            | 0.13      |
| Dpep1                          | 0.08      |
| Drp2                           | 0.15      |
| Eln                            | 0.18      |
| Fa2h                           | 0.11      |
| Fgf4                           | 0.09      |
| Fgf7                           | 0.3       |
| Filip1                         | 0.31      |
| Fmod                           | 0.19      |
| Gdf10                          | 0.22      |
| Gjb1                           | 0.16      |
| Gpm6a                          | 0.21      |

|         |      |
|---------|------|
| Jakmip2 | 0.33 |
| Kcnk1   | 0.26 |
| Kif13b  | 0.24 |
| Lect1   | 0.29 |
| Lep     | 0.04 |
| Lgals12 | 0.27 |
| Limch1  | 0.3  |
| Lyve1   | 0.28 |
| Mal     | 0.3  |
| Mc2r    | 0.2  |
| Mettl7b | 0.28 |
| Mgll    | 0.23 |
| Mrap    | 0.29 |
| Myrip   | 0.3  |
| Nrgn    | 0.28 |
| Pck1    | 0.15 |
| Pfkfb1  | 0.22 |
| Pla2g5  | 0.08 |
| Pllp    | 0.24 |
| Prr15   | 0.23 |
| Prx     | 0.23 |
| Reep6   | 0.31 |
| Retn    | 0.08 |
| Rhobtb3 | 0.23 |
| Sema4g  | 0.17 |
| Sema5a  | 0.18 |
| Slc15a2 | 0.24 |
| Slc36a2 | 0.17 |
| Slc6a4  | 0.31 |
| Slc7a10 | 0.31 |
| St8sia5 | 0.15 |
| Sult1a1 | 0.32 |
| Tagln   | 0.19 |
| Tesk2   | 0.28 |
| Thrsp   | 0.3  |
| Tmem40  | 0.21 |
| Wisp1   | 0.32 |

|         |      |
|---------|------|
| Jakmip2 | 0.15 |
| Kcnk1   | 0.11 |
| Kif13b  | 0.31 |
| Lect1   | 0.09 |
| Lep     | 0.09 |
| Lgals12 | 0.16 |
| Limch1  | 0.18 |
| Lyve1   | 0.22 |
| Mal     | 0.22 |
| Mc2r    | 0.12 |
| Mettl7b | 0.33 |
| Mgll    | 0.23 |
| Mrap    | 0.11 |
| Myrip   | 0.21 |
| Nrgn    | 0.24 |
| Pck1    | 0.09 |
| Pfkfb1  | 0.31 |
| Pla2g5  | 0.14 |
| Pllp    | 0.27 |
| Prr15   | 0.18 |
| Prx     | 0.25 |
| Reep6   | 0.15 |
| Retn    | 0.3  |
| Rhobtb3 | 0.28 |
| Sema4g  | 0.19 |
| Sema5a  | 0.1  |
| Slc15a2 | 0.21 |
| Slc36a2 | 0.13 |
| Slc6a4  | 0.17 |
| Slc7a10 | 0.29 |
| St8sia5 | 0.08 |
| Sult1a1 | 0.11 |
| Tagln   | 0.33 |
| Tesk2   | 0.28 |
| Thrsp   | 0.11 |
| Tmem40  | 0.18 |
| Wisp1   | 0.28 |

## # Up-regulated in Both (> 3 fold, FDR q < 0.05)

| Neurofibroma vs nerve |      |
|-----------------------|------|
| Mouse                 | FC   |
| Aif1                  | 4.46 |
| Ajap1                 | 3.04 |
| Apobec1               | 3.37 |
| Bdnf                  | 5.73 |
| Btc                   | 5.86 |
| Ccl12                 | 3.81 |
| Ccl5                  | 4.56 |
| Cd3e                  | 3.56 |
| Cd72                  | 5.04 |
| Clec5a                | 3.49 |
| Coro1a                | 3.53 |
| Cst6                  | 3.46 |
| Cxcl10                | 4.58 |
| Cytip                 | 3.33 |
| Fgr                   | 3.82 |
| Fyb                   | 3.41 |
| Gabrb2                | 4.54 |
| Gfra3                 | 9.8  |
| Glipr1                | 3.11 |
| Gpnmb                 | 3.97 |
| Gpr35                 | 6.99 |
| Gpr65                 | 3.31 |
| Havcr2                | 4.14 |
| Hck                   | 4.73 |
| Hcls1                 | 3.19 |
| Ifit1                 | 4.41 |
| Itga10                | 3.01 |
| Kcnn4                 | 7.12 |
| Klrd1                 | 4.46 |
| Ly86                  | 6.14 |
| Ms4a4c                | 5.59 |
| Myh1                  | 5.07 |
| Oasl2                 | 4.28 |
| Pkib                  | 6.2  |
| Ptpn22                | 3.12 |

| Day14 after nerve injury |         |
|--------------------------|---------|
| Rat                      | FC      |
| Aif1                     | 3.93    |
| Ajap1                    | 5.68    |
| Apobec1                  | 6.3     |
| Bdnf                     | 5.12    |
| Btc                      | 7.26    |
| Ccl12                    | 4355.37 |
| Ccl5                     | 3.15    |
| Cd3e                     | 9.52    |
| Cd72                     | 3.44    |
| Clec5a                   | 4.14    |
| Coro1a                   | 4.45    |
| Cst6                     | 59.82   |
| Cxcl10                   | 7.85    |
| Cytip                    | 7.78    |
| Fgr                      | 5.81    |
| Fyb                      | 3.2     |
| Gabrb2                   | 522.45  |
| Gfra3                    | 4.81    |
| Glipr1                   | 4.38    |
| Gpnmb                    | 70.92   |
| Gpr35                    | 5.52    |
| Gpr65                    | 8.91    |
| Havcr2                   | 5       |
| Hck                      | 7.24    |
| Hcls1                    | 4.21    |
| Ifit1                    | 6.31    |
| Itga10                   | 3.15    |
| Kcnn4                    | 9.4     |
| Klrd1                    | 19.39   |
| Ly86                     | 4.73    |
| Ms4a4c                   | 10.66   |
| Myh1                     | 9.91    |
| Oasl2                    | 7.71    |
| Pkib                     | 4.7     |
| Ptpn22                   | 4.22    |

|         |      |
|---------|------|
| Sash3   | 3.21 |
| Selp1g  | 3.43 |
| Siglec5 | 7.02 |
| Slamf8  | 3.51 |
| Slc14a1 | 5.65 |
| Slc15a3 | 3.6  |
| Slitrk6 | 5.43 |
| Steap1  | 3.21 |
| Tnc     | 4.79 |
| Vav1    | 3.02 |

|         |       |
|---------|-------|
| Sash3   | 5.33  |
| Selp1g  | 4.36  |
| Siglec5 | 3.23  |
| Slamf8  | 6.33  |
| Slc14a1 | 7.36  |
| Slc15a3 | 6.45  |
| Slitrk6 | 4.25  |
| Steap1  | 14.87 |
| Tnc     | 5.39  |
| Vav1    | 6.95  |

**# Down-regulated in Both (> 3 fold, FDR q < 0.05)**

| <b>Neurofibroma vs nerve</b> |           |
|------------------------------|-----------|
| <b>Mouse</b>                 | <b>FC</b> |
| Acvr1c                       | 0.13      |
| Adh1                         | 0.32      |
| Adipoq                       | 0.05      |
| Alb                          | 0.27      |
| Aqp7                         | 0.22      |
| Car3                         | 0.05      |
| Car4                         | 0.14      |
| Cdo1                         | 0.17      |
| Cidec                        | 0.07      |
| Cntf                         | 0.3       |
| Col23a1                      | 0.22      |
| Cryaa                        | 0.23      |
| Crybb1                       | 0.25      |
| Cyb5r2                       | 0.25      |
| Cyp2e1                       | 0.05      |
| Ddah1                        | 0.22      |
| Ddn                          | 0.26      |
| Dpep1                        | 0.25      |
| Drp2                         | 0.26      |
| Eln                          | 0.33      |
| Fa2h                         | 0.19      |
| Fgf4                         | 0.09      |
| Fmod                         | 0.16      |

| <b>Day14 after nerve injury</b> |           |
|---------------------------------|-----------|
| <b>Rat</b>                      | <b>FC</b> |
| Acvr1c                          | 0.18      |
| Adh1                            | 0.12      |
| Adipoq                          | 0.31      |
| Alb                             | 0.01      |
| Aqp7                            | 0.31      |
| Car3                            | 0.3       |
| Car4                            | 0.15      |
| Cdo1                            | 0.28      |
| Cidec                           | 0.17      |
| Cntf                            | 0.17      |
| Col23a1                         | 0.05      |
| Cryaa                           | 0.16      |
| Crybb1                          | 0.09      |
| Cyb5r2                          | 0.22      |
| Cyp2e1                          | 0.17      |
| Ddah1                           | 0.2       |
| Ddn                             | 0.29      |
| Dpep1                           | 0.09      |
| Drp2                            | 0.2       |
| Eln                             | 0.31      |
| Fa2h                            | 0.21      |
| Fgf4                            | 0.07      |
| Fmod                            | 0.33      |

|         |      |
|---------|------|
| Gsta3   | 0.2  |
| Jakmip2 | 0.33 |
| Kif13b  | 0.24 |
| Lect1   | 0.29 |
| Lep     | 0.04 |
| Lgals12 | 0.27 |
| Limch1  | 0.3  |
| Lyve1   | 0.28 |
| Mc2r    | 0.2  |
| Mettl7b | 0.28 |
| Mrap    | 0.29 |
| Myrip   | 0.3  |
| Nrgn    | 0.28 |
| Pck1    | 0.15 |
| Pfkfb1  | 0.22 |
| Pla2g5  | 0.08 |
| Prr15   | 0.23 |
| Reep6   | 0.31 |
| Sema5a  | 0.18 |
| Slc15a2 | 0.24 |
| Slc36a2 | 0.17 |
| Smtn    | 0.25 |
| St8sia5 | 0.15 |
| Sult1a1 | 0.32 |
| Tagln   | 0.19 |
| Tesk2   | 0.28 |
| Thrsp   | 0.3  |
| Tmem27  | 0.17 |
| Wisp1   | 0.32 |

|         |      |
|---------|------|
| Gsta3   | 0.01 |
| Jakmip2 | 0.07 |
| Kif13b  | 0.31 |
| Lect1   | 0.08 |
| Lep     | 0.15 |
| Lgals12 | 0.19 |
| Limch1  | 0.22 |
| Lyve1   | 0.22 |
| Mc2r    | 0.09 |
| Mettl7b | 0.32 |
| Mrap    | 0.21 |
| Myrip   | 0.31 |
| Nrgn    | 0.3  |
| Pck1    | 0.3  |
| Pfkfb1  | 0.31 |
| Pla2g5  | 0.09 |
| Prr15   | 0.21 |
| Reep6   | 0.2  |
| Sema5a  | 0.19 |
| Slc15a2 | 0.25 |
| Slc36a2 | 0.33 |
| Smtn    | 0.31 |
| St8sia5 | 0.21 |
| Sult1a1 | 0.19 |
| Tagln   | 0.28 |
| Tesk2   | 0.3  |
| Thrsp   | 0.2  |
| Tmem27  | 0.01 |
| Wisp1   | 0.31 |
